# Supplementary material
Source: PubMed Central journal article supplement (PMC7964440)
Supplement: 3592_table.pdf [file 3592_table.pdf]

**On-line Table: MS and NMO: discriminating radiologic features**

|                                                                                     | NMO                                                                                                                                                                                                                              | MS                                                                                                                                      |
|-------------------------------------------------------------------------------------|----------------------------------------------------------------------------------------------------------------------------------------------------------------------------------------------------------------------------------|-----------------------------------------------------------------------------------------------------------------------------------------|
| Conventional spine MRI                                                              |                                                                                                                                                                                                                                  |                                                                                                                                         |
| Lesion length <sup>12,46</sup>                                                      | ≥3 Vertebral segments                                                                                                                                                                                                            | <3 Vertebral segments (may coalesce)                                                                                                    |
| TI hypointensity <sup>16,18</sup>                                                   | Frequent                                                                                                                                                                                                                         | Rare                                                                                                                                    |
| Central gray matter involvement <sup>16</sup>                                       | Frequent                                                                                                                                                                                                                         | Occasional                                                                                                                              |
| Optic pathway MRI                                                                   |                                                                                                                                                                                                                                  |                                                                                                                                         |
| Optic chiasm inflammation <sup>29,31</sup>                                          | Frequent                                                                                                                                                                                                                         | Occasional                                                                                                                              |
| Simultaneous bilateral optic neuritis <sup>30</sup>                                 | Occasional                                                                                                                                                                                                                       | Rare                                                                                                                                    |
| Conventional brain MRI                                                              |                                                                                                                                                                                                                                  |                                                                                                                                         |
| Normal initial brain MR findings <sup>2,12</sup>                                    | Frequent                                                                                                                                                                                                                         | Rare                                                                                                                                    |
| Lesion distribution <sup>8,9,30,32-35,38,41,46</sup>                                | Frequent: nonspecific deep white matter;<br>occasional: periependymal (dorsal brain stem,<br>periaqueductal, diencephalon, around lateral<br>ventricles); confluent hemispheric;<br>longitudinally extensive corticospinal tract | Periventricular, subcortical,<br>juxtacortical, cortical posterior<br>fossa                                                             |
| Corpus callosum lesions <sup>34,47</sup>                                            | Occasional (≤18.2%); acute phase: multiple,<br>round and edematous, diffuse splenial<br>involvement                                                                                                                              | Very common: small, discrete or linear<br>and in the lower margin of the<br>corpus callosum or callososeptal<br>interface; nonedematous |
| Enhancement pattern <sup>8,52-54</sup>                                              | Cloud-like, “pencil-thin” ependymal, thick<br>periventricular, rarely solid                                                                                                                                                      | Incomplete or complete ring, solid                                                                                                      |
| Nonconventional brain MRI                                                           |                                                                                                                                                                                                                                  |                                                                                                                                         |
| Cortical lesions (DIR, 7T MRI) <sup>55,58</sup>                                     | Rare, possibly never                                                                                                                                                                                                             | Very frequent                                                                                                                           |
| Gray matter atrophy <sup>56,58,65,70</sup>                                          | Regional, predominantly visual and motor<br>cortices                                                                                                                                                                             | Diffuse cortex and deep gray matter                                                                                                     |
| Normal-appearing gray matter<br>MT imaging <sup>56,57</sup>                         | Discrepant results, possibly reduced mean MT<br>ratio                                                                                                                                                                            | Reduced MT ratio                                                                                                                        |
| Normal-appearing white matter<br>DTI <sup>56,59-61</sup><br>MRS <sup>56,62,63</sup> | Subtle alterations, predominantly optic radiation<br>Normal                                                                                                                                                                      | Diffusely abnormal<br>Abnormal                                                                                                          |
| Nonconventional spinal MRI                                                          |                                                                                                                                                                                                                                  |                                                                                                                                         |
| Cervical cord MT ratio <sup>17</sup>                                                | Reduced mean MT ratio vs controls, not vs MS                                                                                                                                                                                     | Reduced mean MT ratio                                                                                                                   |
| Cervical cord DTI                                                                   |                                                                                                                                                                                                                                  |                                                                                                                                         |
| Lesional <sup>75</sup>                                                              | Increased radial diffusivity vs controls and vs MS                                                                                                                                                                               | Increased radial diffusivity vs controls                                                                                                |
| Nonlesional <sup>73,74</sup>                                                        | Reduced fractional anisotropy                                                                                                                                                                                                    | Reduced fractional anisotropy                                                                                                           |

**Note:**—DIR indicates double inversion recovery.
